# Supplementary material
Source: publisher site journal article supplement (https://www.dovepress.com/article/245519)
Supplement: Supplementary file 1 [file get_supplementary_file.php]

**Online Supplement**

**Sputum 6 gene expression signature predicts inflammatory phenotypes of COPD**

Katherine J Baines1, Netsanet A Negewo1, Peter G Gibson1,2, Juan-Juan Fu3, Jodie L Simpson1, Peter AB Wark1,2, Michael Fricker1, Vanessa M McDonald1,2,4

1Priority Research Centre for Healthy Lungs, Hunter Medical Research Institute, The University of Newcastle, Callaghan, NSW, Australia.

2Department of Respiratory and Sleep Medicine, John Hunter Hospital, Newcastle, NSW, Australia.

3Respiratory Group, Department of Integrated Traditional Chinese and West Medicine, West China Hospital, Sichuan University, People's Republic of China.

4School of Nursing and Midwifery, Faculty of Health and Medicine, The University of Newcastle, Callaghan, NSW, Australia.

Correspondence: Dr. Katherine Baines, Hunter Medical Research Institute, Level 2 West Wing, Locked Bag 1000, New Lambton, NSW 2305, Australia. Phone: +61 2 40420090, Fax: +61 2 40420046, E-mail: [katherine.baines@newcastle.edu.au](mailto:katherine.baines@newcastle.edu.au).

**Supplementary Methods**

**Sputum induction and analysis**

Airflow limitation was assessed using spirometry (Medgraphics, CPFS/DTM usb Spirometer, BreezeSuite v7.1, Saint Paul, USA). Sputum induction with hypertonic saline (4.5%) was performed in participants whose FEV1 was ≥1L using our previously described methods 1. In those with FEV1 <1L, 0.9% saline was used. For gene expression, Buffer RLT (Qiagen, Hilden, Germany) was immediately added to 100μL of selected sputum and stored at -80°C until RNA extraction. For inflammatory cell counts, selected sputum was dispersed using dithiothreitol, and total cell count and viability were performed. Cytospins were prepared, stained (May-Grunwald–Giemsa) and a differential cell count obtained from 400 non-squamous cells.

**6GS Analysis**

Briefly, sputum RNA was extracted using the Qiagen RNeasy Mini Kit (Qiagen, Hilden, Germany) and quantified using the Quant-iT RiboGreen RNA Quantitation Assay Kit (Invitrogen, Waltham, MA, USA) as per manufacturer’s instructions. A total of 200uL of RNA was reverse-transcribed to cDNA, which was used in real-time quantitative polymerase chain reaction (qPCR) to detect gene expression of *CLC*, *CPA3*, *DNASE1L3*, *IL1B*, *ALPL* and *CXCR2* using standard Taqman based methods (Applied Biosystems, Waltham, MA, USA). Taqman qPCR primer and probes for 6GS members were purchased in kit form (Applied Biosystems, Waltham, MA, USA), and were combined with Taqman gene expression master mix as per manufacturer’s instructions in duplicate singleplex real-time PCRs (7500 Real Time PCR System, Applied Biosystems). Statistical analysis of diagnostic ability was performed on the change in cycle threshold (ΔCt) between the target gene and housekeeping β-actin. For relative gene expression levels, data were log transformed (2-ΔCt) and scaled.

**Statistical analysis for quantitative assessment of 6GS**

Logistic regression was used to calculate the predicted value of an individual having the particular COPD inflammatory phenotype based on the expression (cycle threshold (Ct)) of each target gene compared to β-actin (ΔCt) using multiple logistic regression for the combination of 6 genes to generate one set of predicted values. This was generated in the Stata 15 statistical package. The resulting output was a set of predicted value cut points which had ranging sensitivities and specificities plotted on a receiver operating characteristic (ROC) curve, which we could use to calculate the area under the curve (AUC) for the level of accuracy to correctly classify people, as well as a p value of significance for the regression itself.

The regression equation utilised was:

p = exp(β0 + β1X1 + β2X2 + β3X3 + β4X4 + β5X5 + β6X6)/(1 + exp(β0 + β1X1 + β2X2 + β3X3 + β4X4 + β5X5 + β6X6)

1=CLC; 2=CPA3, 3=DNASE1L3, 4=IL1B, 5=ALPL, 6=CXCR4

β values are the constants and coefficients generated from the regression equation. X values refer to the PCR result for the individual participant in question.

The predicted value is the probability that the person has the inflammatory phenotype given the level of target gene expression. An individuals’ gene expression measurements can be entered into the logistic regression equation to determine their predicted value, a value above or below the cut point would determine their likelihood of the particular COPD inflammatory phenotype with the defined sensitivity and specificity calculated from the ROC curve. Sensitivity and specificity were used to describe the discriminatory power of the gene expression combinations. We selected cut-points with the highest percentage correctly classified in order to maximise the discriminatory power in any given diagnostic situation.

**Supplementary Results**

**Reproducibility of the 6 gene expression signature**


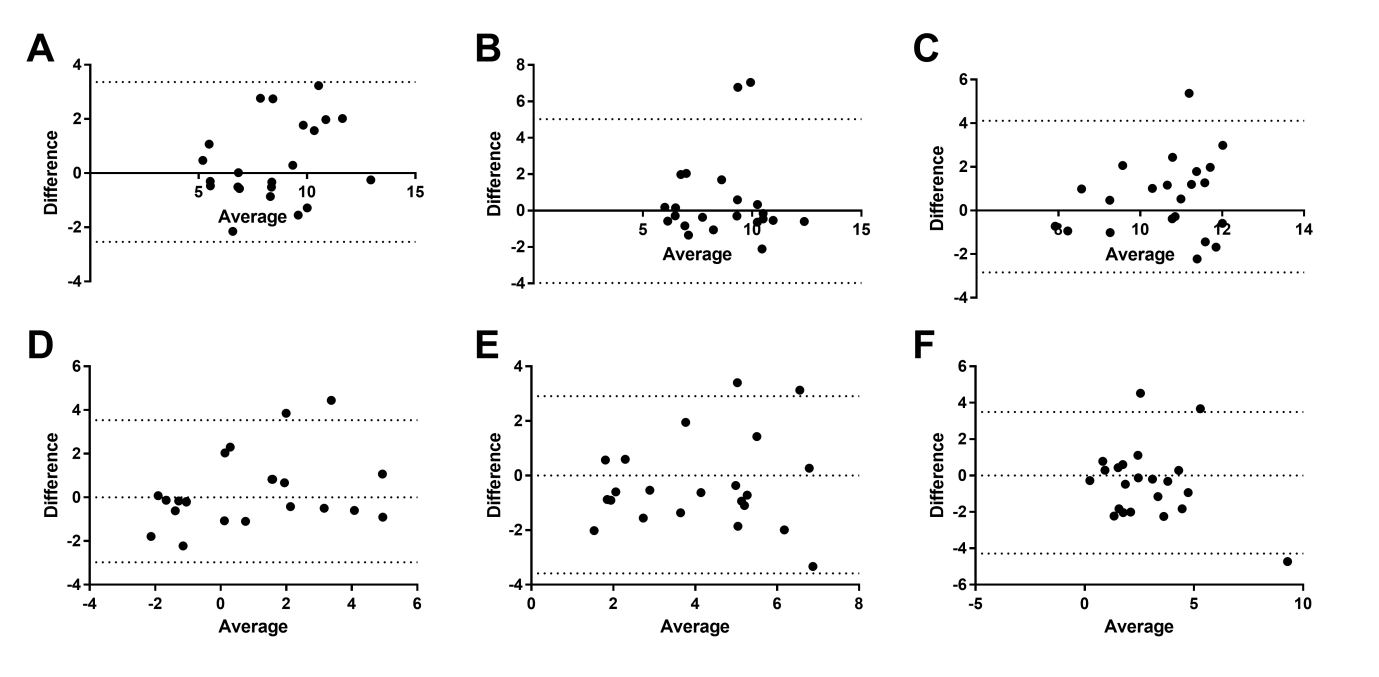


**Figure S1:** Mean-difference Bland-Altman plots for the E-COPD markers CLC (A), CPA3 (B) and DNASE1L3 (C), and N-COPD markers IL1B (D), ALPL (E) and CXCR2 (F). Bland-Altman plots indicate the mean ΔCt against the absolute difference in ΔCt between visits for each gene. Horizontal dotted lines represent the 95% limits of agreement (mean difference ± 1.96 SD).

**Table S1: Prospective cohort study diagnostic value of the 6GS in predicting inflammatory phenotype of COPD.**

| **Comparison** | **AUC%** | **Model P value** |
| --- | --- | --- |
| E+ve-COPD vs. E-ve-COPD | 86.3 | 0.0004 |
| N+ve-COPD vs. N-ve-COPD | 92.2 | <0.0001 |
| E-COPD vs. PG-COPD | 91.9 | 0.0049 |
| E-COPD vs. N-COPD | 100.0 | <0.0001 |
| E-COPD vs. MG-COPD | 100.0 | <0.0001 |
| N-COPD vs. PG-COPD | 93.2 | <0.0001 |
| N-COPD vs. MG-COPD | 97.0 | 0.0031 |

Abbreviations: AUC: area under the curve, E-COPD: eosinophilic COPD, MG-COPD: mixed granulocytic COPD, N-COPD: neutrophilic COPD, PG-COPD: paucigranulocytic COPD.E+ve-COPD: COPD with sputum eosinophilia (E and MG-COPD) E-ve-COPD: COPD without sputum eosinophilia (N and PG-COPD). N+ve-COPD: COPD with sputum neutrophilia (N and MG-COPD), N-ve-COPD: COPD without sputum neutrophilia (E and PG-COPD).

**Table S2: Prospective cohort study diagnostic ability of 6GS and inflammatory cell counts to predict exacerbation prone COPD.**

| **Comparison** | **Logistic regression** | | **AUC%** | **Model**  **p value** |
| --- | --- | --- | --- | --- |
| **Coefficient** | **Constant** |
| **6GS**  CLC  CPA3  DNASE1L3  IL1B  ALPL  CXCR2 | -0.073736  -0.142748  0.1876808  -0.8275487  0.3616405  0.4859209 | -2.745335 | 77.2 | 0.034 |
| **Sputum E%** | 0.0076956 | -0.4990264 | 57.3 | 0.753 |
| **Sputum N%** | 0.0006388 | -0.4870963 | 52.2 | 0.953 |
| **Sputum E% and N% combined**  Sputum E%  Sputum N% | 0.0090353  0.0018711 | -0.6101097 | 55.2 | 0.939 |

**Abbreviations: AUC: area under the curve, 6GS: 6 gene signature, E: eosinophil, N: neutrophil.**

**References:**

1Gibson, PG, Wlodarczyk, JW, Hensley, MJ, Gleeson, M, Henry, RL, Cripps, AW, and Clancy, RL, Epidemiological association of airway inflammation with asthma symptoms and airway hyperresponsiveness in childhood. *Am J Respir Crit Care Med.* 1998; **158**: p. 36-41.
